# Supplementary material for: Synthesis, crystal structures and magnetic properties of cyanide- and phenolate-bridged [MIIINiII]2tetranuclear complexes (M = Fe and Cr)
Source: Royal Society of Chemistry journal article supplement (doi:10.1039/b500168b), 2005-01-01
Supplement: b500168b.pdf [file b500168b.pdf]

## Supplementary Information

**Figure S1.** Perspective drawing of the structure of complex **3** showing the atom numbering. The hydrogen atoms and the acetonitrile molecules are omitted for simplicity.

**Figure S2.** A view along the *a* axis showing the hydrogen bonding between the neutral tetranuclear units of complex **3**.

**Equations connecting the energies of the five calculated states [one high spin and four broken symmetry state] and the exchange parameters:**

$$EB - EA = 8b + 8c$$

$$EC - EA = 3a + 4b + 4c$$

$$ED - EA = 4b + 4c + 6d$$

$$EE - EA = 3a + 8b + 6d$$

where

A, B C and D are the calculated configurations

and

$$a = J_{\text{Ni-Ni}}, b = J_{\text{Cr-Ni}}, c = J_{\text{Cr-Nia}} \text{ and } d = J_{\text{Cr-Cra}} .$$
